# Supplementary material for: Impact of weather seasonality and sexual transmission on the spread of Zika fever
Source: PubMed Central journal article supplement (PMC6863851; doi:10.1038/s41598-019-53062-z), 2019-11-19
Supplement: 41598_2019_53062_MOESM1_ESM.pdf [file 41598_2019_53062_MOESM1_ESM.pdf]

# Impact of weather seasonality and sexual transmission on the spread of Zika fever

Attila Dénes<sup>\*1</sup>, Mahmoud A. Ibrahim<sup>1,2</sup>, Lillian Oluoch<sup>1</sup>, Miklós Tekeli<sup>1</sup>, and Tamás Tekeli<sup>1</sup>

<sup>1</sup>Bolyai Institute, University of Szeged,  
Aradi vértanúk tere 1., Szeged H-6720, Hungary

<sup>2</sup>Department of Mathematics, Faculty of Science, Mansoura University,  
Mansoura 35516, Egypt

## Supplementary information

### S.1 The governing equations

In accordance with the transmission diagram in Figure 3 and the parameter description given in Table 1, introducing the notation  $N_h(t)$  and  $N_f(t)$ , for the total human and total female human population, respectively, the corresponding system of differential equations takes the form

$$\begin{aligned}
 S'_f(t) &= \frac{B_h}{2} - \beta \frac{\kappa_e E_m(t) + \kappa_a I_m^a(t) + I_m^s(t) + \kappa_r I_m^r(t)}{N_f(t)} S_f(t) - \frac{\tilde{\alpha}_h(t) I_v(t)}{N_h(t)} S_f(t) - dS_f(t), \\
 E'_f(t) &= \beta \frac{\kappa_e E_m(t) + \kappa_a I_m^a(t) + I_m^s(t) + \kappa_r I_m^r(t)}{N_f(t)} S_f(t) + \frac{\tilde{\alpha}_h(t) I_v(t)}{N_h(t)} S_f(t) - \nu_h E_f(t) - dE_f(t), \\
 I_f^a(t) &= \theta \nu_h E_f(t) - \gamma_a I_f^a(t) - dI_f^a(t), \\
 I_f^s(t) &= (1 - \theta) \nu_h E_f(t) - \gamma_s I_f^s(t) - dI_f^s(t), \\
 R'_f(t) &= \gamma_a I_f^a(t) + \gamma_s I_f^s(t) - dR_f(t), \\
 S'_m(t) &= \frac{B_h}{2} - \frac{\tilde{\alpha}_h(t) I_v(t)}{N_h(t)} S_m(t) - dS_m(t), \\
 E'_m(t) &= \frac{\tilde{\alpha}_h(t) I_v(t)}{N_h(t)} S_m(t) - \nu_h E_m(t) - dE_m(t), \\
 I_m^a(t) &= \theta \nu_h E_m(t) - \gamma_a I_m^a(t) - dI_m^a(t), \\
 I_m^s(t) &= (1 - \theta) \nu_h E_m(t) - \gamma_s I_m^s(t) - dI_m^s(t), \\
 I_m^r(t) &= \gamma_a I_m^a(t) + \gamma_s I_m^s(t) - \gamma_r I_m^r(t) - dI_m^r(t), \\
 R'_m(t) &= \gamma_r I_m^r(t) - dR_m(t), \\
 S'_v(t) &= \tilde{B}_v(t) - \tilde{\alpha}_v(t) \frac{\eta_e E_f(t) + \eta_a I_f^a(t) + I_f^s(t) + \eta_e E_m(t) + \eta_a I_m^a(t) + I_m^s(t) + I_m^r(t)}{N_h(t)} S_v(t) - \mu S_v(t), \\
 E'_v(t) &= \tilde{\alpha}_v(t) \frac{\eta_e E_f(t) + \eta_a I_f^a(t) + I_f^s(t) + \eta_e E_m(t) + \eta_a I_m^a(t) + I_m^s(t) + I_m^r(t)}{N_h(t)} S_v(t) - (\nu_v + \mu) E_v(t), \\
 I'_v(t) &= \nu_v E_v(t) - \mu I_v(t).
 \end{aligned} \tag{S.1}$$

---

<sup>\*</sup>Corresponding author. Email: denesa@math.u-szeged.hu

Here,  $B_h$  and  $d$  denote human birth and death rate, respectively,  $\beta$  stands for transmission rate from symptomatically infected men to susceptible women, while for transmission rates from exposed, asymptotically infected and convalescent men to women are obtained by multiplying  $\beta$  by  $\kappa_e, \kappa_a$  and  $\kappa_r$ , respectively. The parameter  $\theta$  is the fraction of asymptotically infected among all infected people. The length of latent period for humans is  $1/\nu_h$  and  $1/\gamma_a, 1/\gamma_s$  denote the length of infected period for asymptotically and symptomatically infected people, respectively, while  $1/\gamma_r$  is the length of the period during which recovered men are still infectious through sexual contact. The functions  $\tilde{\alpha}_h(t)$ ,  $\tilde{\alpha}_v(t)$  and  $\tilde{B}_v(t)$  denote transmission rate from an infectious mosquito to a susceptible human, transmission rate from an infected human to a susceptible mosquito and mosquito birth rate, respectively. These functions are assumed to be time periodic with one year as a period and, following e.g. [49] they are assumed to be of the form  $\tilde{\alpha}_h(t) = \alpha_h \cdot (\sin(\frac{2\pi}{P}t + b) + a)$ ,  $\tilde{\alpha}_v(t) = \alpha_v \cdot (\sin(\frac{2\pi}{P}t + b) + a)$  and  $\tilde{B}_v(t) = B_v \cdot (\sin(\frac{2\pi}{P}t + b) + a)$ , respectively, where  $P$  is period length,  $a, b$  are free adjustment parameters and  $\alpha_h, \alpha_v, B_v$  are constants. Just like in the case of human-to-human transmission, we also introduce the modification parameters  $\eta_e, \eta_a$  for infectiousness of exposed and asymptotically infected people, respectively. We have  $1/\nu_v$  for the length of the latent period for mosquitoes, while average life span of mosquitoes is given by  $1/\mu$ .

The introduction of a nonautonomous model was needed to reproduce an epidemic with multiple peaks; this is supported by Figure S.1 where we tried to fit the autonomous model obtained from (S.1) by setting the time-dependent parameters (mosquito birth and death rates and biting rates) constant.

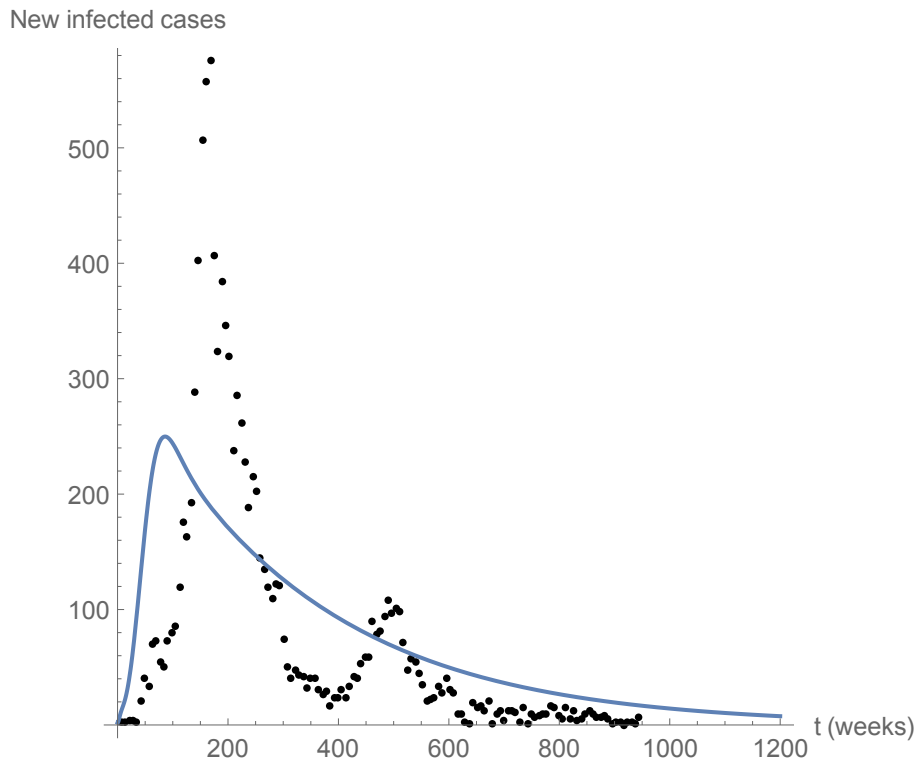

Figure S.1: Best fitting solution of the autonomous model for the case of Costa Rica.

## S.2 Derivation of the basic reproduction number of the autonomous model

To calculate the basic reproduction number  $\mathcal{R}_0$  of the autonomous model obtained from (S.1) by setting the time-dependent parameters (mosquito birth and death rates and biting rates) constant, i.e.  $\tilde{B}_v(t) \equiv B_v$ ,  $\tilde{\alpha}_h(t) \equiv \alpha_h$  and  $\tilde{\alpha}_v(t) \equiv \alpha_v$ , we follow the general approach established in [50]. Given the infectious states  $E_f, I_f^a, I_f^s, E_m, I_m^a, I_m^s, I_m^r, E_v$  and  $I_v$  in (S.1), we can create the transmission vector  $\mathcal{F}$  representing the new infections flowing only into the exposed compartments given by

$$\mathcal{F} = \left( \beta \frac{\kappa_e E_m + \kappa_a I_m^a + I_m^s + \kappa_r I_m^r}{N_f} S_f + \frac{\alpha_H I_V}{N_H} S_F, 0, 0, \frac{\alpha_h I_v}{N_h} S_m, 0, 0, 0, \frac{\alpha_h I_v}{N_h} S_m, \right. \\ \left. 0, 0, \alpha_v \frac{\eta_e E_f + \eta_a I_f^a + I_f^s + \eta_e E_m + \eta_a I_m^a + I_m^s + I_m^r}{N_h} S_v, 0 \right)^\top,$$

while the transition vector  $\mathcal{V}$  which denotes the outflow from the infectious compartments in (S.1), is given by

$$\mathcal{V} = \left( (\nu_h + d)E_f, (\gamma_a + d)I_f^a - \theta\nu_h E_f, (\gamma_s + d)I_f^s - (1 - \theta)\nu_h E_f, (\nu_h + d)E_m, (\gamma_a + d)I_m^a - \theta\nu_h E_m, \right. \\ \left. (\gamma_s + d)I_m^s - (1 - \theta)\nu_h E_m, (\gamma_r + d)I_m^r - \gamma_a I_m^a - \gamma_s I_m^s, (\nu_v + \mu)E_v, \mu I_v - \nu_v E_v \right)^\top$$

here we note that the notations  $\alpha_h, \alpha_v$  and  $B_v$  stand for the (now constant) transmission rate from an infectious mosquito to a susceptible human, transmission rate from an infected human to a susceptible mosquito and mosquito birth rate, respectively. Substituting the values in the disease-free equilibrium  $N_h = \frac{B_h}{d}$  and  $N_f = \frac{B_h}{2d}$ , we compute the Jacobian  $F$  from  $\mathcal{F}$  given by

$$F = \begin{pmatrix} 0 & 0 & 0 & \beta\kappa_e & \beta\kappa_a & \beta & \beta\kappa_r & 0 & \frac{\alpha_h}{2} \\ 0 & 0 & 0 & 0 & 0 & 0 & 0 & 0 & 0 \\ 0 & 0 & 0 & 0 & 0 & 0 & 0 & 0 & 0 \\ 0 & 0 & 0 & 0 & 0 & 0 & 0 & 0 & \frac{\alpha_h}{2} \\ 0 & 0 & 0 & 0 & 0 & 0 & 0 & 0 & 0 \\ 0 & 0 & 0 & 0 & 0 & 0 & 0 & 0 & 0 \\ 0 & 0 & 0 & 0 & 0 & 0 & 0 & 0 & 0 \\ \frac{\alpha_v B_v \eta_e d}{\mu B_h} & \frac{\alpha_v B_v \eta_a d}{\mu B_h} & \frac{\alpha_v B_v d}{\mu B_h} & \frac{\alpha_v B_v \eta_e d}{\mu B_h} & \frac{\alpha_v B_v \eta_a d}{\mu B_h} & \frac{\alpha_v B_v d}{\mu B_h} & \frac{\alpha_v B_v d}{\mu B_h} & \frac{\alpha_v B_v d}{\mu B_h} & 0 \\ 0 & 0 & 0 & 0 & 0 & 0 & 0 & 0 & 0 \end{pmatrix}$$

and the Jacobian  $V$  from  $\mathcal{V}$  given by

$$V = \begin{pmatrix} d + \nu_h & 0 & 0 & 0 & 0 & 0 & 0 & 0 & 0 \\ -\theta\nu_h & \gamma_a + d & 0 & 0 & 0 & 0 & 0 & 0 & 0 \\ -(1 - \theta)\nu_h & 0 & \gamma_s + d & 0 & 0 & 0 & 0 & 0 & 0 \\ 0 & 0 & 0 & d + \nu_h & 0 & 0 & 0 & 0 & 0 \\ 0 & 0 & 0 & -\theta\nu_h & \gamma_a + d & 0 & 0 & 0 & 0 \\ 0 & 0 & 0 & -(1 - \theta)\nu_h & 0 & \gamma_s + d & 0 & 0 & 0 \\ 0 & 0 & 0 & 0 & -\gamma_a & -\gamma_s & \gamma_r + d & 0 & 0 \\ 0 & 0 & 0 & 0 & 0 & 0 & 0 & \mu + \nu_v & 0 \\ 0 & 0 & 0 & 0 & 0 & 0 & 0 & -\nu_v & \mu \end{pmatrix},$$

therefore the characteristic polynomial of the next generation matrix  $FV^{-1}$  is

$$\lambda^6 (R_{mf} R_{vh} R_{fv} + R_{vh} (R_{fv} + R_{mv}) \lambda - \lambda^3) = 0$$

where

$$\begin{aligned}
R_{mf} &= \frac{\beta\kappa_e}{(d+\nu_h)} + \frac{\beta(1-\theta)\nu_h}{(\gamma_s+d)(d+\nu_h)} + \frac{\beta\kappa_a\theta\nu_h}{(\gamma_a+d)(d+\nu_h)} + \frac{\beta\kappa_r\nu_h(\gamma_a\gamma_s+\theta\gamma_ad+(1-\theta)\gamma_sd)}{(\gamma_a+d)(\gamma_r+d)(\gamma_s+d)(d+\nu_h)} \\
R_{vh} &= R_{vm} = R_{vf} = \frac{\alpha_h\nu_v}{2\mu(\mu+\nu_v)} \\
R_{fv} &= \frac{\alpha_v B_v \eta_e d}{\mu B_h (d+\nu_h)} + \frac{\alpha_v B_v \eta_a \theta d \nu_h}{\mu B_h (\gamma_a+d)(d+\nu_h)} + \frac{\alpha_v B_v (1-\theta) d \nu_h}{\mu B_h (\gamma_s+d)(d+\nu_h)} \\
R_{mv} &= \frac{\alpha_v B_v \eta_e d}{\mu B_h (d+\nu_h)} + \frac{\alpha_v B_v (1-\theta) d \nu_h}{\mu B_h (\gamma_s+d)(d+\nu_h)} + \frac{\alpha_v B_v \eta_a \theta d \nu_h}{\mu B_h (\gamma_a+d)(\gamma_s+d)(d+\nu_h)} + \frac{\alpha_v B_v d \nu_h (\gamma_a\gamma_s+\theta\gamma_ad+(1-\theta)\gamma_sd)}{\mu B_h (\gamma_a+d)(\gamma_r+d)(\gamma_s+d)(d+\nu_h)}
\end{aligned}$$

The characteristic polynomial therefore is the following cubic equation given by

$$\lambda^3 - R_{vh}(R_{fv} + R_{mv})\lambda - R_{mf}R_{vh}R_{fv} = 0$$

According to [50], the basic reproduction number  $\mathcal{R}_0$  is the spectral radius of  $FV^{-1}$ . Thus, the basic reproduction number  $\mathcal{R}_0$  corresponds to the dominant eigenvalue given by the root of the cubic equation

$$\begin{aligned}
\mathcal{R}_0 &= \frac{\sqrt[3]{2}R_{vh}(R_{fv}+R_{mv})}{\sqrt[3]{27R_{mf}R_{vh}R_{fv} + \sqrt{729R_{mf}^2R_{vh}^2R_{fv}^2 - 108R_{vh}^3(R_{fv}+R_{mv})^3}}} \\
&\quad + \frac{\sqrt[3]{27R_{mf}R_{vh}R_{fv} + \sqrt{729R_{mf}^2R_{vh}^2R_{fv}^2 - 108R_{vh}^3(R_{fv}+R_{mv})^3}}}{3\sqrt[3]{2}}
\end{aligned}$$

### S.3 Numerical estimation of the basic reproduction number of the nonautonomous model

In periodic epidemiological models, one can determine the basic reproduction as the spectral radius of a linear integral operator on a space of periodic functions (see [39] for details). The value of the basic reproduction number generally cannot be calculated analytically, but one can numerically approximate it. To do so, first, one writes the model

$$x'(t) = f(x(t))$$

as

$$x'_i = \mathcal{F}_i(t, x) - \mathcal{V}_i(t, x), \quad i = 1, \dots, n,$$

where  $\mathcal{F}_i(t, x)$  stands for the be the rate of new infections in compartment  $i$  and  $\mathcal{V}_i(t, x) = \mathcal{V}_i^-(t, x) - \mathcal{V}_i^+(t, x)$  with  $\mathcal{V}_i^+(t, x)$  denoting the rate of transfer into compartment  $i$  by all means different from new infections, and  $\mathcal{V}_i^-(t, x)$  is the rate of transfer out of the  $i$ th compartment. Let  $m$  be the number of infectious compartments. The matrices  $F(t)$  and  $V(t)$  are defined as

$$F(t) = \left( \frac{\partial \mathcal{F}_i(t, x_0(t))}{\partial x_j} \right)_{1 \leq i, j \leq m} \quad \text{and} \quad V(t) = \left( \frac{\partial \mathcal{V}_i(t, x_0(t))}{\partial x_j} \right)_{1 \leq i, j \leq m}$$

and consider the linear periodic equation

$$\frac{dw}{dt} = \left( -V(t) + \frac{F(t)}{\lambda} \right) w, \quad t \in \mathbb{R} \quad (\text{S.2})$$

with  $\lambda \in (0, \infty)$ . First we find the monodromy matrix  $\Phi$  of (S.2) by finding  $m$  linearly independent solutions, most simply by taking the (linearly independent) unit vectors of  $\mathbb{R}^m$  as initial values.

Then we select an initial guess  $\lambda_0$  and determine the spectral radius  $\rho(\Phi(\lambda_0))$ . If this  $\rho_0$  is less than 1, then we set  $\lambda_- = \lambda_0$  and increase our guess  $\lambda_0$  to find an upper bound  $\lambda_+$  with which  $\rho(\Phi(\lambda_+))$  is larger than 1. If  $\rho_0 > 1$ , we proceed similarly, but the other way around. Then we keep choosing  $\lambda_j \in (\lambda_-, \lambda_+)$  e.g. as  $(\lambda_- + \lambda_+)/2$  and if  $\rho(\Phi(\lambda_j)) < 1$ , we set  $\lambda_- = \lambda_j$ , otherwise  $\lambda_+ = \lambda_j$ . We proceed until  $\lambda_+ - \lambda_- < \varepsilon$  for some sufficiently small  $\varepsilon$ . For more details see e.g. [40].
